# Supplementary material
Source: PubMed Central journal article supplement (PMC3125533)

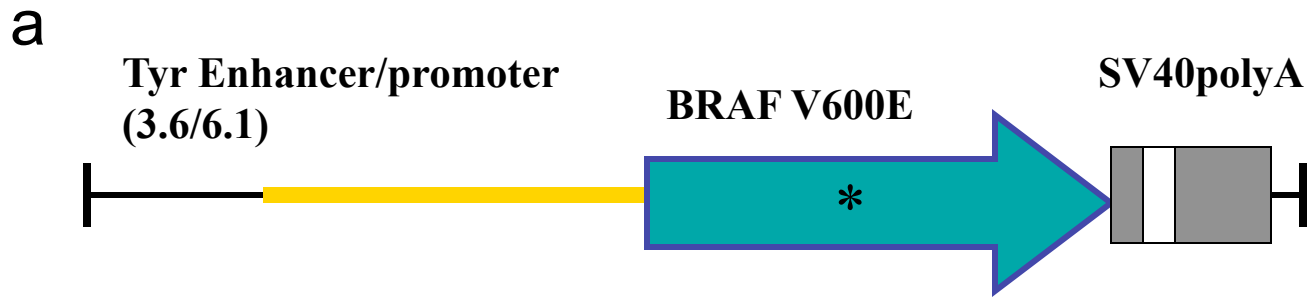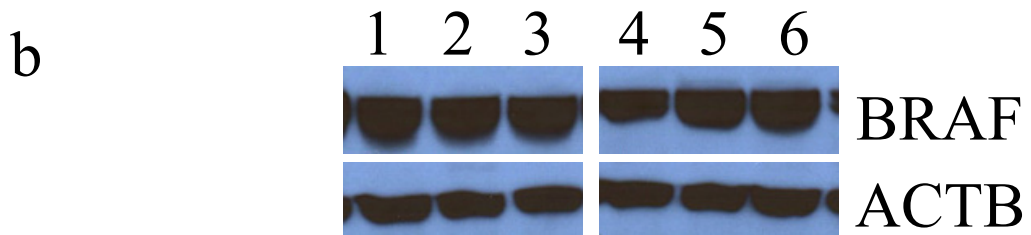

Supplemental Fig.1

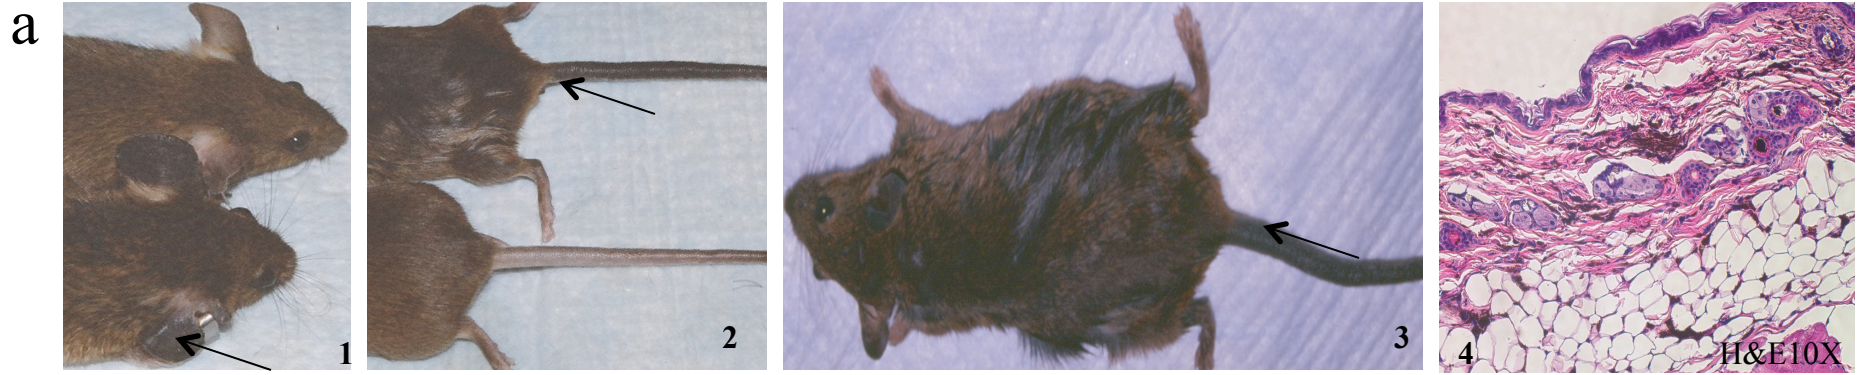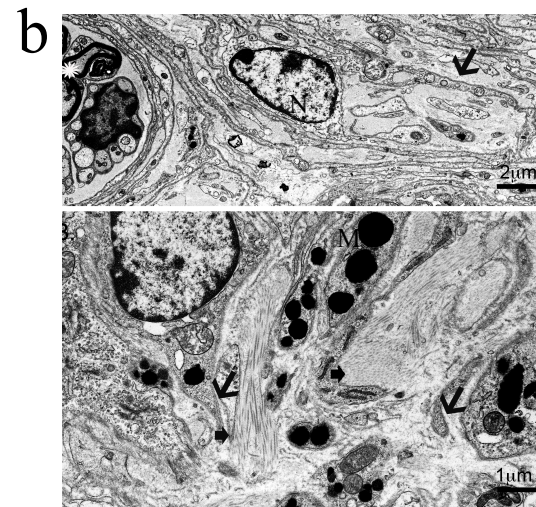

Supplemental fig.2



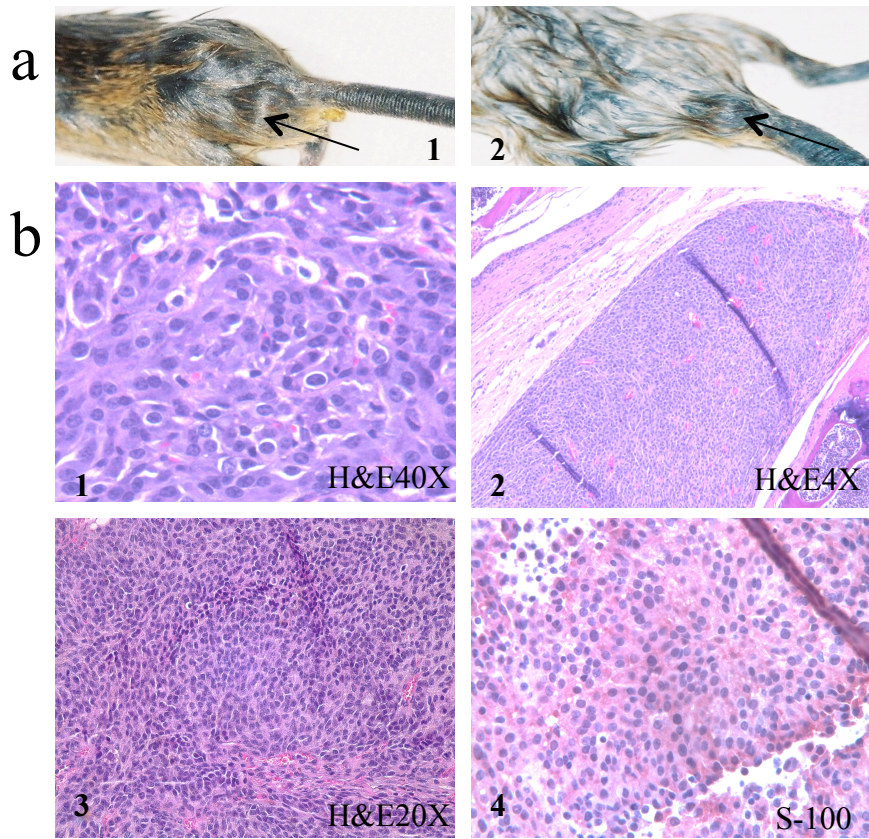

Supplemental fig.3

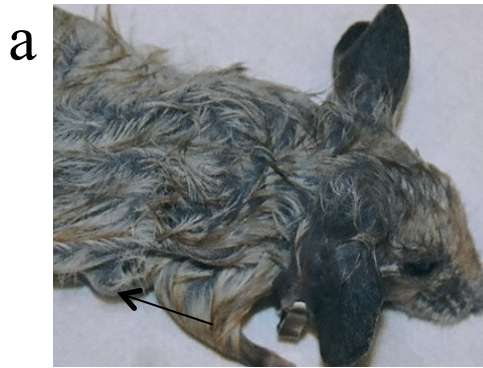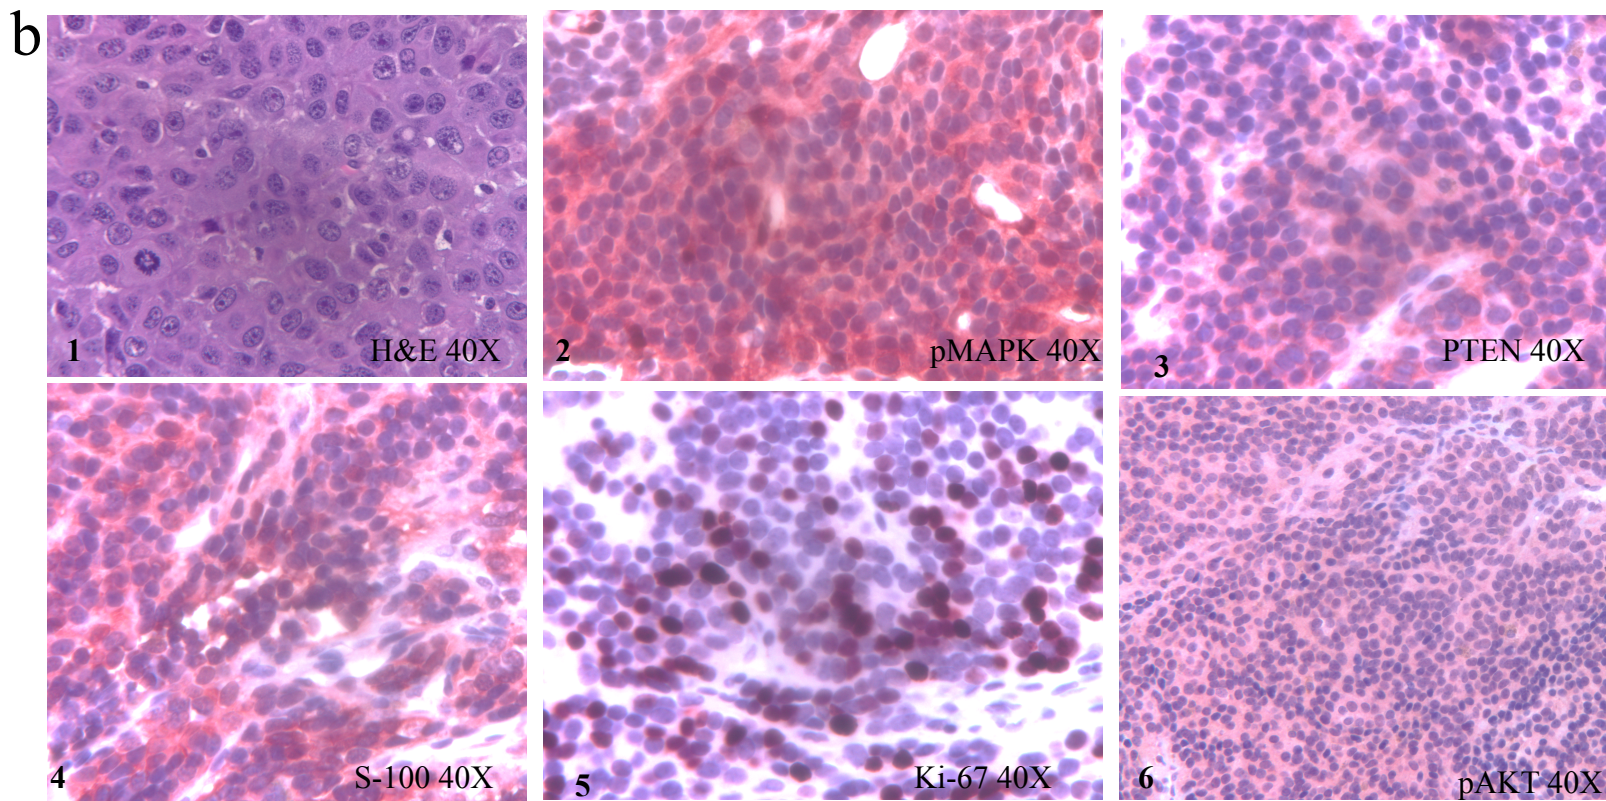

Supplemental fig.4

Supplement: NIHMS301902-supplement-supplementary.pdf [file NIHMS301902-supplement-supplementary.pdf]
